# Supplementary material for: Trans crystallization behavior and strong reinforcement effect of cellulose nanocrystals on reinforced poly(butylene succinate) nanocomposites
Source: PubMed Central journal article supplement (PMC9080038; doi:10.1039/c8ra01868e), 2018-04-24
Supplement: RA-008-C8RA01868E-s001.pdf [file RA-008-C8RA01868E-s001.pdf]

## Supporting Information

### **Trans crystallization Behaviors and Strong reinforcement effect of Cellulose nanocrystals on Reinforced Poly (butylene succinate) nanocomposites**

Taeho Kim<sup>a,c</sup>, Hyeonyeol Jeon<sup>a</sup>, Jonggeon Jegal<sup>a</sup>, Joo Hyun Kim<sup>c</sup>, Hoichang Yang<sup>d</sup>, Jeyoung Park<sup>\*\*\*a,b</sup>, Dongyeop X. Oh<sup>\*\*a,b</sup> and Sung Yeon Hwang<sup>\*a,b</sup>

<sup>a</sup> *Research Center for Industrial Chemical Biotechnology, Korea Research Institute of Chemical Technology (KRICT), Ulsan 44429, Republic of Korea.*

<sup>b</sup> *Green Chemistry and Environmental Biotechnology, University of Science and Technology (UST), Daejeon 34113, Republic of Korea*

<sup>c</sup> *Department of Chemistry, Pukyong National University, Busan, 48513, Republic of Korea*

<sup>d</sup> *Department of Applied Organic Materials Engineering, Inha University, Incheon 22212, Korea*

To whom correspondence should be addressed E-mail : [\\*\\*\\*jypark@kRICT.re.kr](mailto:***jypark@kRICT.re.kr) (J. Park), [\\*\\*dongyeop@kRICT.re.kr](mailto:**dongyeop@kRICT.re.kr) (D.X. Oh), [\\*crew75@kRICT.re.kr](mailto:*crew75@kRICT.re.kr) (S.Y. Hwang).

\* Corresponding author.

\*\* Corresponding author.

\*\*\* Corresponding author.

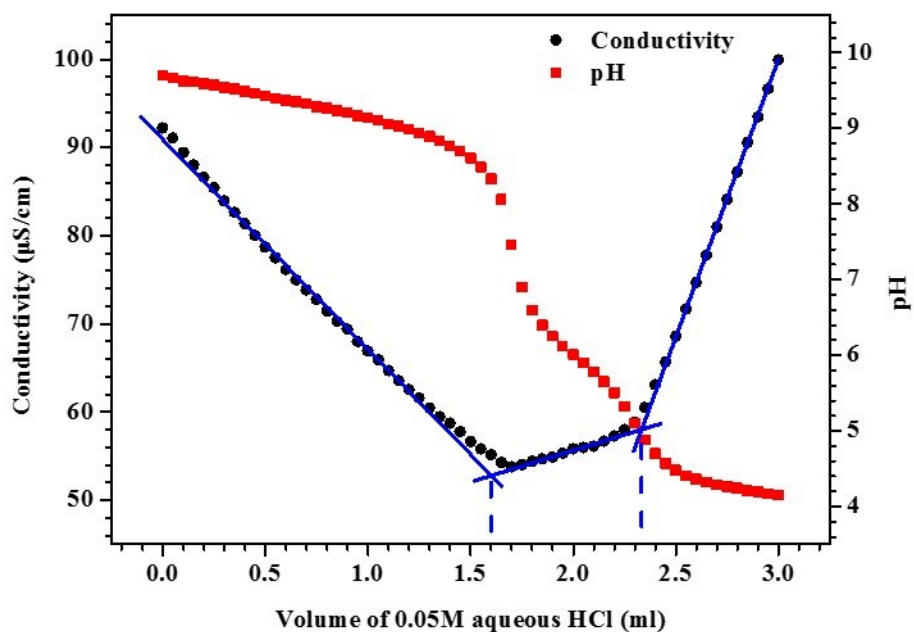

**Figure 1S.** Activated Na<sup>+</sup> Activated Na<sup>+</sup> cation of CNC by Conductometric titration

0.2g of spray-dried CNC powder was containing in 300ml of Ultrapure (milliQ) water and dispersed by ultrasonication. A pH value of the CNC suspension was initialized by 2M NaOH(aq.) until pH 10. Activated Na<sup>+</sup> cation of CNC was titrated with 0.05M HCl(aq.) step by step. Total amount of added 0.05M HCl(aq.) was 3 ml and the period consist of that 0.05ml of 0.05M HCl(aq.) addition and waiting for 1 min.

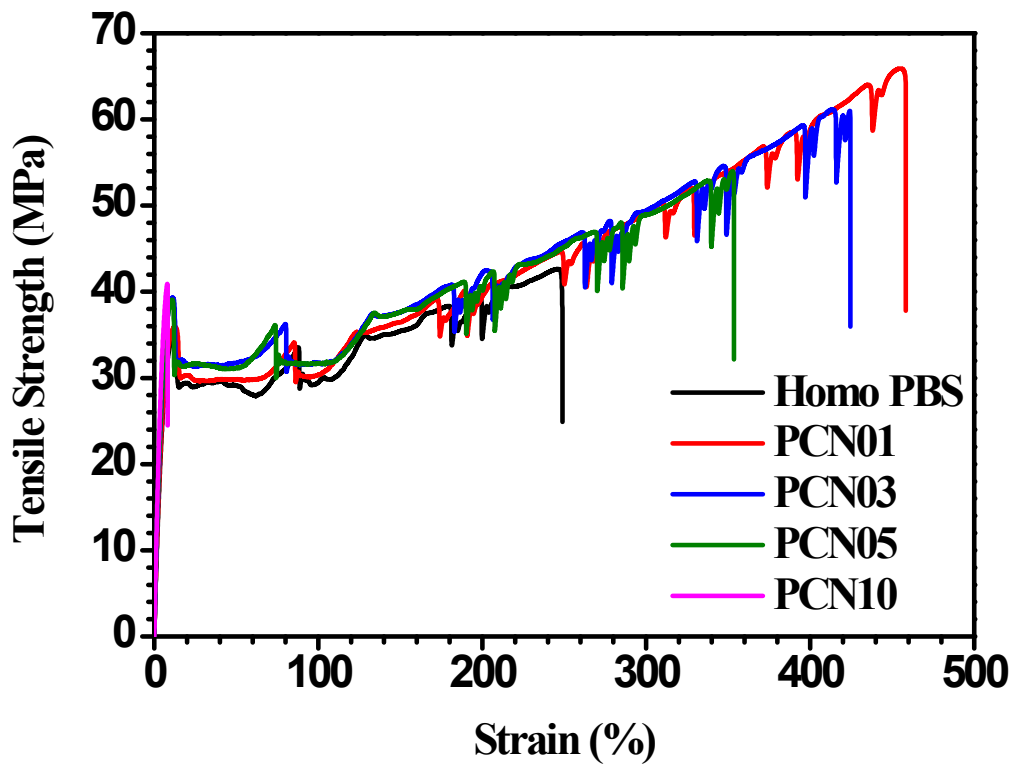

Figure S2. Tensile Properties of Homo PBS and PCN samples: pulling at a rate of 10mm/min

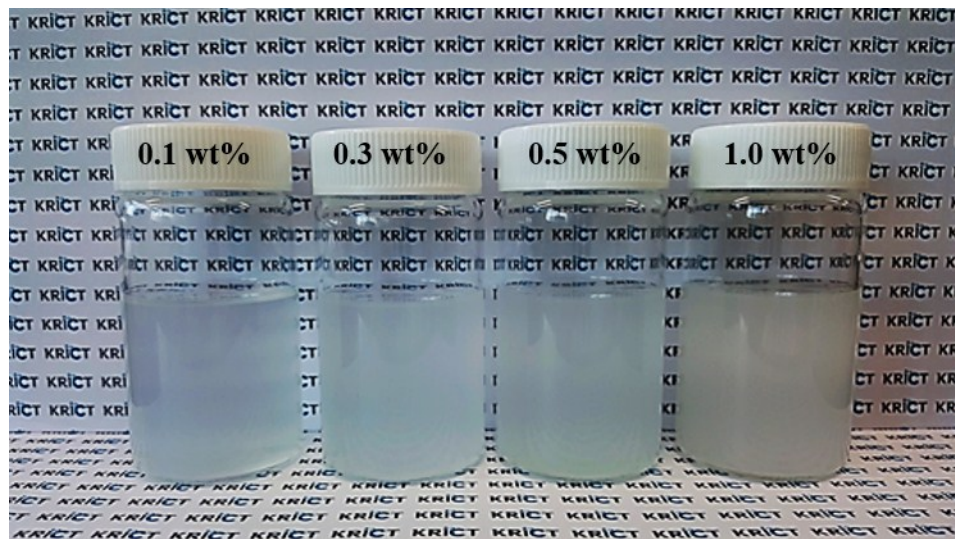

Figure S3. Image of dispersed CNC with increasing concentration in 1,4-butanediol

Movie S1. Mechanical test for PP, Homo PBS and the 0.1 wt.% CNC-loaded nanocomposites
